# Supplementary material
Source: PubMed Central journal article supplement (PMC10728499)
Supplement: NIHMS1950918-supplement-Supplemental_Tables.pdf [file NIHMS1950918-supplement-Supplemental_Tables.pdf]

**Supplemental Table 1. Time to Event Analysis for Development of Dementia Based on Vision Status as a Time-Varying Predictor**

| <b>Self-reported visual impairment</b>          | <b>HR</b> | <b>95% CI</b> | <b>P value</b> |
|-------------------------------------------------|-----------|---------------|----------------|
| Unadjusted                                      | 4.4       | (3.9 - 4.8)   | <0.001         |
| Adjusted <sup>1</sup>                           |           |               |                |
| Demographics + SES                              | 1.2       | (1.2 - 1.2)   | <0.001         |
| + Clinical risk factors                         | 1.2       | (1.1 - 1.2)   | <0.001         |
| + Hearing and physical function impairments     | 1.1       | (1.1 - 1.2)   | <0.001         |
| <b>Self-reported distance visual impairment</b> | <b>HR</b> | <b>95% CI</b> | <b>P value</b> |
| Unadjusted                                      | 4.3       | (3.9 - 4.9)   | <0.001         |
| Adjusted <sup>1</sup>                           |           |               |                |
| Demographics + SES                              | 1.2       | (1.1 - 1.2)   | <0.001         |
| + Clinical risk factors                         | 1.2       | (1.1 - 1.2)   | <0.001         |
| + Hearing and physical function impairments     | 1.1       | (1.1 - 1.2)   | <0.001         |
| <b>Self-reported near visual impairment</b>     | <b>HR</b> | <b>95% CI</b> | <b>P value</b> |
| Unadjusted                                      | 4.2       | (3.7 - 4.8)   | <0.001         |
| Adjusted <sup>1</sup>                           |           |               |                |
| Demographics + SES                              | 1.2       | (1.1 - 1.2)   | <0.001         |
| + Clinical risk factors                         | 1.2       | (1.1 - 1.2)   | <0.001         |
| + Hearing and physical function impairments     | 1.1       | (1.1 - 1.2)   | <0.001         |

<sup>1</sup> Models adjusted for demographics and socioeconomic status (age, gender, race/ethnicity, education level, and annual household income), adding clinical risk factors (smoking status, diabetes, HTN, CHD, MI, and stroke), and finally including hearing and physical function impairments. Visual impairment, clinical risk factors, and hearing and physical function impairments were treated as time varying covariates.

HR: hazard ratios for risk of developing dementia

**Supplemental Table 2. Time to Event Analysis for Development of Visual Impairment Based on Dementia Status as a Time-Varying Predictor**

| <b>Probable/possible dementia</b>           | <b>HR</b> | <b>95% CI</b> | <b>P value</b> |
|---------------------------------------------|-----------|---------------|----------------|
| Unadjusted                                  | 4.4       | (4.1 - 4.9)   | <0.001         |
| Adjusted <sup>1</sup>                       |           |               |                |
| Demographics + SES                          | 1.2       | (1.2 - 1.2)   | <0.001         |
| + Clinical risk factors                     | 1.2       | (1.2 - 1.2)   | <0.001         |
| + Hearing and physical function impairments | 1.2       | (1.1 - 1.2)   | <0.001         |

<sup>1</sup> Models adjusted for demographics and socioeconomic status (age, gender, race/ethnicity, education level, and annual household income), adding clinical risk factors (smoking status, diabetes, HTN, CHD, MI, and stroke), and finally including hearing and physical function impairments. Dementia, clinical risk factors, and hearing and physical function impairments were treated as time varying covariates.

HR: hazard ratios for risk of developing visual impairment

HRs are reported with 95% confidence intervals (CI). Two-sided *p*-values <0.05 were deemed statistically significant.

HRs are reported with 95% confidence intervals (CI). Two-sided *p*-values <0.05 were deemed statistically significant.
